# Supplementary material for: José Antonio Marina, ensayista: "el núcleo de todas las culturas es el mismo"
Source: Royal Society of Chemistry journal article supplement (doi:10.1039/c4dt02840f), 2000-01-01

# checkCIF/PLATON report

You have not supplied any structure factors. As a result the full set of tests cannot be run.

No syntax errors found.      CIF dictionary      Interpreting this report

## Datablock: a

---

Bond precision:    O- B = 0.0091 A                      Wavelength=0.71073

Cell:                      a=11.574(4)              b=11.574(4)              c=12.361(4)  
                                alpha=90              beta=90              gamma=120  
Temperature:              296 K

|                | Calculated                                            | Reported               |
|----------------|-------------------------------------------------------|------------------------|
| Volume         | 1434.0(13)                                            | 1433.9(9)              |
| Space group    | P 63/m                                                | P6(3)/m                |
| Hall group     | -P 6c                                                 | -P 6c                  |
| Moiety formula | 6(B3 Cu O12 P2), 3(Na0.67<br>O0.67), 2(K), 10(Na0.50) | ?                      |
| Sum formula    | B18 Cu6 K2 Na10 O74 P12                               | B9 Cu3 H5 K Na5 O37 P6 |
| Mr             | 2439.62                                               | 1224.78                |
| Dx,g cm-3      | 2.825                                                 | 2.825                  |
| Z              | 1                                                     | 2                      |
| Mu (mm-1)      | 2.914                                                 | 2.914                  |
| F000           | 1184.0                                                | 1184.0                 |
| F000'          | 1188.52                                               |                        |
| h,k,lmax       | 14,14,15                                              | 14,14,15               |
| Nref           | 1045                                                  | 1040                   |
| Tmin,Tmax      | 0.538,0.627                                           | 0.518,0.653            |
| Tmin'          | 0.464                                                 |                        |

Correction method= MULTI-SCAN

Data completeness= 0.995                      Theta(max)= 26.440

R(reflections)= 0.0525( 741)                      wR2(reflections)= 0.1402( 1040)

S = 1.051                      Npar= 104

---

The following ALERTS were generated. Each ALERT has the format  
**test-name\_ALERT\_alert-type\_alert-level.**

Click on the hyperlinks for more details of the test.

---

### Alert level C

|                                                 |                |   |
|-------------------------------------------------|----------------|---|
| PLAT041_ALERT_1_C Calc. and Reported SumFormula | Strings Differ | ? |
|-------------------------------------------------|----------------|---|

---

## ● Alert level G

FORMU01\_ALERT\_2\_G There is a discrepancy between the atom counts in the  
\_chemical\_formula\_sum and the formula from the \_atom\_site\* data.  
Atom count from \_chemical\_formula\_sum: H5 B9 Cu3 K1 Na5 O37 P6  
Atom count from the \_atom\_site data: B9 Cu3 K1 Na5 O37 P6  
CELLZ01\_ALERT\_1\_G Difference between formula and atom\_site contents detected.  
CELLZ01\_ALERT\_1\_G WARNING: H atoms missing from atom site list. Is this intentional?  
From the CIF: \_cell\_formula\_units\_Z 2  
From the CIF: \_chemical\_formula\_sum B9 Cu3 H5 K Na5 O37 P6  
TEST: Compare cell contents of formula and atom\_site data

| atom | Z*formula | cif sites | diff  |
|------|-----------|-----------|-------|
| B    | 18.00     | 18.00     | 0.00  |
| Cu   | 6.00      | 6.00      | 0.00  |
| H    | 10.00     | 0.00      | 10.00 |
| K    | 2.00      | 2.00      | 0.00  |
| Na   | 10.00     | 10.00     | 0.00  |
| O    | 74.00     | 74.00     | 0.00  |
| P    | 12.00     | 12.00     | 0.00  |

|                   |                                                  |            |
|-------------------|--------------------------------------------------|------------|
| PLAT004_ALERT_5_G | Info: Polymeric Structure Found with Dimension . | 1          |
| PLAT005_ALERT_5_G | No _iucr_refine_instructions_details in the CIF  | ?          |
| PLAT045_ALERT_1_G | Calculated and Reported Z Differ by .....        | 0.50 Ratio |
| PLAT083_ALERT_2_G | SHELXL Second Parameter in WGHT Unusually Large. | 12.06      |
| PLAT152_ALERT_1_G | The Supplied and Calc. Volume s.l. Differ by ... | 4 Units    |
| PLAT302_ALERT_4_G | Note: Anion/Solvent Disorder .....               | 33 Perc.   |
| PLAT793_ALERT_4_G | The Model has Chirality at P1 (Verify) ....      | S          |

---

0 **ALERT level A** = Most likely a serious problem - resolve or explain  
0 **ALERT level B** = A potentially serious problem, consider carefully  
1 **ALERT level C** = Check. Ensure it is not caused by an omission or oversight  
10 **ALERT level G** = General information/check it is not something unexpected

5 ALERT type 1 CIF construction/syntax error, inconsistent or missing data  
2 ALERT type 2 Indicator that the structure model may be wrong or deficient  
0 ALERT type 3 Indicator that the structure quality may be low  
2 ALERT type 4 Improvement, methodology, query or suggestion  
2 ALERT type 5 Informative message, check

---

---

It is advisable to attempt to resolve as many as possible of the alerts in all categories. Often the minor alerts point to easily fixed oversights, errors and omissions in your CIF or refinement strategy, so attention to these fine details can be worthwhile. In order to resolve some of the more serious problems it may be necessary to carry out additional measurements or structure refinements. However, the purpose of your study may justify the reported deviations and the more serious of these should normally be commented upon in the discussion or experimental section of a paper or in the "special\_details" fields of the CIF. checkCIF was carefully designed to identify outliers and unusual parameters, but every test has its limitations and alerts that are not important in a particular case may appear. Conversely, the absence of alerts does not guarantee there are no aspects of the results needing attention. It is up to the individual to critically assess their own results and, if necessary, seek expert advice.

### **Publication of your CIF in IUCr journals**

A basic structural check has been run on your CIF. These basic checks will be run on all CIFs submitted for publication in IUCr journals (*Acta Crystallographica*, *Journal of Applied Crystallography*, *Journal of Synchrotron Radiation*); however, if you intend to submit to *Acta Crystallographica Section C* or *E*, you should make sure that full publication checks are run on the final version of your CIF prior to submission.

### **Publication of your CIF in other journals**

Please refer to the *Notes for Authors* of the relevant journal for any special instructions relating to CIF submission.

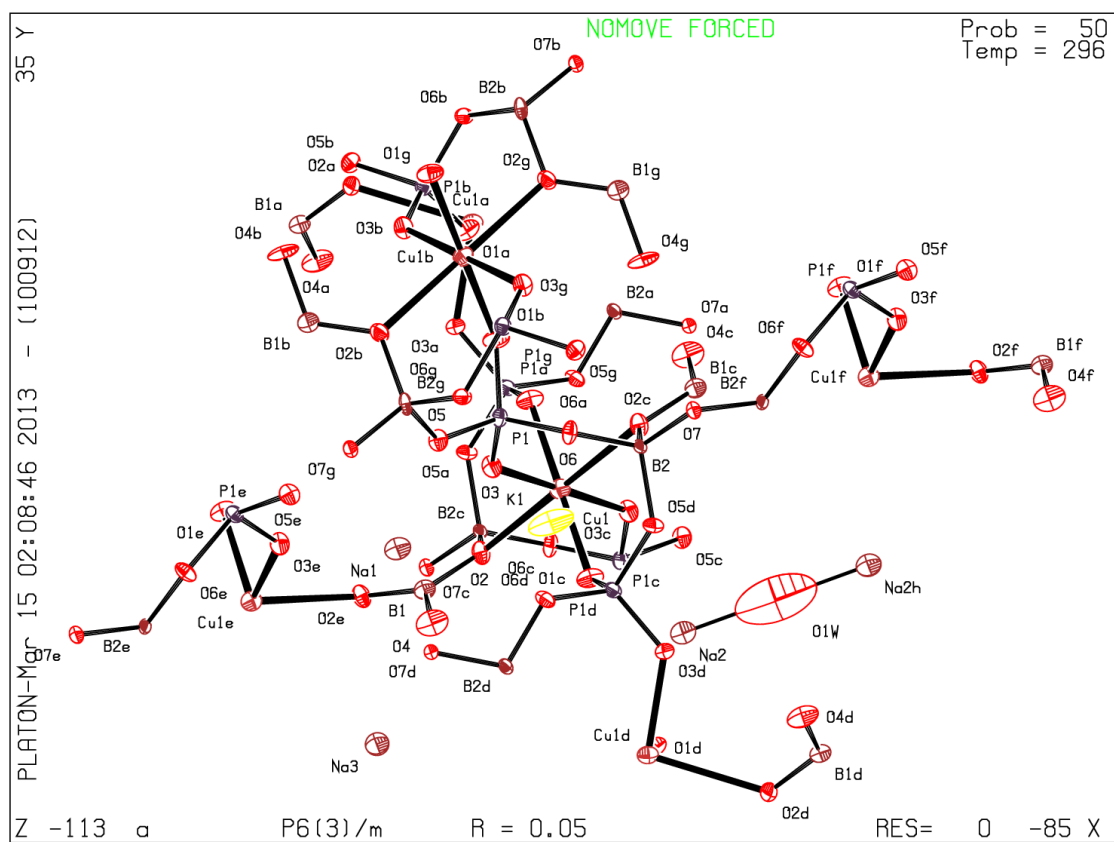

Supplement: c4dt02840f1.zip [file c4dt02840f1.zip]
