# Supplementary material for: José Antonio Marina, ensayista: "el núcleo de todas las culturas es el mismo"
Source: Royal Society of Chemistry journal article supplement (doi:10.1039/c4dt02840f), 2000-01-01
Supplement: c4dt02840f1.zip [file c4dt02840f1.zip]

Archive with 2 entries (2 files):
- CSD-426408.cif
- CSD-426408-checkcif.pdf
