# Supplementary material for: José Antonio Marina, ensayista: "el núcleo de todas las culturas es el mismo"
Source: Royal Society of Chemistry journal article supplement (doi:10.1039/c4dt02840f), 2000-01-01
Supplement: c4dt02840f1.zip [file c4dt02840f1.zip › CSD-426408.cif]

 
data_a 
 
_audit_creation_method            SHELXL-97 
_chemical_name_systematic 
; 
 ? 
; 
_chemical_name_common             ? 
_chemical_melting_point           ? 
_chemical_formula_moiety          ? 
_chemical_formula_sum 
 'B9 Cu3 H5 K Na5 O37 P6' 
_chemical_formula_weight          1224.78 
 
loop_ 
 _atom_type_symbol 
 _atom_type_description 
 _atom_type_scat_dispersion_real 
 _atom_type_scat_dispersion_imag 
 _atom_type_scat_source 
 'C'  'C'   0.0033   0.0016 
 'International Tables Vol C Tables 4.2.6.8 and 6.1.1.4' 
 'H'  'H'   0.0000   0.0000 
 'International Tables Vol C Tables 4.2.6.8 and 6.1.1.4' 
 'B'  'B'   0.0013   0.0007 
 'International Tables Vol C Tables 4.2.6.8 and 6.1.1.4' 
 'Na'  'Na'   0.0362   0.0249 
 'International Tables Vol C Tables 4.2.6.8 and 6.1.1.4' 
 'O'  'O'   0.0106   0.0060 
 'International Tables Vol C Tables 4.2.6.8 and 6.1.1.4' 
 'P'  'P'   0.1023   0.0942 
 'International Tables Vol C Tables 4.2.6.8 and 6.1.1.4' 
 'Cu'  'Cu'   0.3201   1.2651 
 'International Tables Vol C Tables 4.2.6.8 and 6.1.1.4' 
 'K'  'K'   0.2009   0.2494 
 'International Tables Vol C Tables 4.2.6.8 and 6.1.1.4' 
 
_symmetry_cell_setting           'Hexagonal'
_symmetry_space_group_name_H-M   'P6(3)/m  '
_symmetry_space_group_name_Hall  '-P 6C'
 
loop_ 
 _symmetry_equiv_pos_as_xyz 
 'x, y, z' 
 '-y, x-y, z' 
 '-x+y, -x, z' 
 '-x, -y, z+1/2' 
 'y, -x+y, z+1/2' 
 'x-y, x, z+1/2' 
 '-x, -y, -z' 
 'y, -x+y, -z' 
 'x-y, x, -z' 
 'x, y, -z-1/2' 
 '-y, x-y, -z-1/2' 
 '-x+y, -x, -z-1/2' 
 
_cell_length_a                    11.574(4) 
_cell_length_b                    11.574(4) 
_cell_length_c                    12.361(4) 
_cell_angle_alpha                 90.00 
_cell_angle_beta                  90.00 
_cell_angle_gamma                 120.00 
_cell_volume                      1433.9(9) 
_cell_formula_units_Z             2 
_cell_measurement_temperature     296(2) 
_cell_measurement_reflns_used    1045
_cell_measurement_theta_min        3.30
_cell_measurement_theta_max       27.71
 
_exptl_crystal_description        ? 
_exptl_crystal_colour             ? 
_exptl_crystal_size_max           0.26 
_exptl_crystal_size_mid           0.18 
_exptl_crystal_size_min           0.16 
_exptl_crystal_density_meas       ? 
_exptl_crystal_density_diffrn     2.825 
_exptl_crystal_density_method     'not measured' 
_exptl_crystal_F_000              1184 
_exptl_absorpt_coefficient_mu     2.914 
_exptl_absorpt_correction_type    Multi-scan 
_exptl_absorpt_correction_T_min   0.5179 
_exptl_absorpt_correction_T_max   0.6528 
_exptl_absorpt_process_details    SADABS 
 
_exptl_special_details 
; 
 ? 
; 
 
_diffrn_ambient_temperature       296(2) 
_diffrn_radiation_wavelength      0.71073 
_diffrn_radiation_type            MoK\a 
_diffrn_radiation_source          'fine-focus sealed tube' 
_diffrn_radiation_monochromator   graphite 
_diffrn_measurement_device_type  'Bruker APEX-II CCD'
_diffrn_measurement_method       '\f and \w scans' 
_diffrn_detector_area_resol_mean  ? 
_diffrn_reflns_number             8202 
_diffrn_reflns_av_R_equivalents   0.0798 
_diffrn_reflns_av_sigmaI/netI     0.0471 
_diffrn_reflns_limit_h_min        -14 
_diffrn_reflns_limit_h_max        14 
_diffrn_reflns_limit_k_min        -14 
_diffrn_reflns_limit_k_max        9 
_diffrn_reflns_limit_l_min        -15 
_diffrn_reflns_limit_l_max        15 
_diffrn_reflns_theta_min          2.62 
_diffrn_reflns_theta_max          26.44 
_reflns_number_total              1040 
_reflns_number_gt                 741 
_reflns_threshold_expression      >2sigma(I) 
 
_computing_data_collection      'Bruker APEX2'
_computing_cell_refinement      'Bruker SAINT'
_computing_data_reduction       'Bruker SAINT'  
_computing_structure_solution   'SHELXS-97 (Sheldrick, 2008)'
_computing_structure_refinement 'SHELXL-97 (Sheldrick, 2008)'
_computing_molecular_graphics   'Bruker SHELXTL'
_computing_publication_material 'Bruker SHELXTL'
 
_refine_special_details 
; 
 Refinement of F^2^ against ALL reflections.  The weighted R-factor wR and 
 goodness of fit S are based on F^2^, conventional R-factors R are based 
 on F, with F set to zero for negative F^2^. The threshold expression of 
 F^2^ > 2sigma(F^2^) is used only for calculating R-factors(gt) etc. and is 
 not relevant to the choice of reflections for refinement.  R-factors based 
 on F^2^ are statistically about twice as large as those based on F, and R- 
 factors based on ALL data will be even larger. 
; 
 
_refine_ls_structure_factor_coef  Fsqd  
_refine_ls_matrix_type            full 
_refine_ls_weighting_scheme       calc  
_refine_ls_weighting_details 
 'calc w=1/[\s^2^(Fo^2^)+(0.0613P)^2^+12.0601P] where P=(Fo^2^+2Fc^2^)/3' 
_atom_sites_solution_primary      direct 
_atom_sites_solution_secondary    difmap 
_atom_sites_solution_hydrogens    ? 
_refine_ls_hydrogen_treatment     ? 
_refine_ls_extinction_method      none 
_refine_ls_extinction_coef        ? 
_refine_ls_number_reflns          1040 
_refine_ls_number_parameters      104 
_refine_ls_number_restraints      0 
_refine_ls_R_factor_all           0.0774 
_refine_ls_R_factor_gt            0.0525 
_refine_ls_wR_factor_ref          0.1402 
_refine_ls_wR_factor_gt           0.1253 
_refine_ls_goodness_of_fit_ref    1.051 
_refine_ls_restrained_S_all       1.051 
_refine_ls_shift/su_max           0.000 
_refine_ls_shift/su_mean          0.000 
 
loop_ 
 _atom_site_label 
 _atom_site_type_symbol 
 _atom_site_fract_x 
 _atom_site_fract_y 
 _atom_site_fract_z 
 _atom_site_U_iso_or_equiv 
 _atom_site_adp_type 
 _atom_site_occupancy 
 _atom_site_symmetry_multiplicity 
 _atom_site_calc_flag 
 _atom_site_refinement_flags 
 _atom_site_disorder_assembly 
 _atom_site_disorder_group 
K1 K 1.0000 1.0000 0.5000 0.0396(12) Uani 1 6 d S . . 
Cu1 Cu 0.5000 0.5000 0.5000 0.0138(3) Uani 1 2 d S . . 
P1 P 0.81043(15) 0.62265(16) 0.46480(13) 0.0105(4) Uani 1 1 d . . . 
B1 B 0.3965(10) 0.4934(10) 0.2500 0.014(2) Uani 1 2 d S . . 
B2 B 0.7562(7) 0.7078(7) 0.6510(5) 0.0101(14) Uani 1 1 d . . . 
Na1 Na 0.7303(4) 0.7081(4) 0.2500 0.0236(9) Uani 1 2 d S . . 
Na2 Na 0.3333 0.6667 0.5998(8) 0.020(2) Uani 0.50 3 d SP . . 
Na3 Na 0.3333 0.6667 0.1039(7) 0.020(2) Uani 0.50 3 d SP . . 
O1 O 0.4909(4) 0.3238(4) 0.4984(4) 0.0171(10) Uani 1 1 d . . . 
O1W O 0.3333 0.6667 0.7500 0.139(13) Uani 1 6 d S . . 
O2 O 0.3569(4) 0.4304(4) 0.3468(3) 0.0144(10) Uani 1 1 d . . . 
O3 O 0.6712(4) 0.5747(4) 0.4218(3) 0.0139(9) Uani 1 1 d . . . 
O4 O 0.4829(6) 0.6315(6) 0.2500 0.0225(15) Uani 1 2 d S . . 
O5 O 0.9027(4) 0.7059(4) 0.3705(3) 0.0133(9) Uani 1 1 d . . . 
O6 O 0.8463(4) 0.7224(4) 0.5611(3) 0.0126(9) Uani 1 1 d . . . 
O7 O 0.8299(5) 0.7460(6) 0.7500 0.0093(12) Uani 1 2 d S . . 
 
loop_ 
 _atom_site_aniso_label 
 _atom_site_aniso_U_11 
 _atom_site_aniso_U_22 
 _atom_site_aniso_U_33 
 _atom_site_aniso_U_23 
 _atom_site_aniso_U_13 
 _atom_site_aniso_U_12 
K1 0.0186(12) 0.0186(12) 0.082(4) 0.000 0.000 0.0093(6) 
Cu1 0.0114(6) 0.0129(6) 0.0160(6) 0.0014(4) 0.0016(4) 0.0052(4) 
P1 0.0100(8) 0.0116(8) 0.0095(7) 0.0001(6) 0.0020(6) 0.0050(6) 
B1 0.011(5) 0.014(5) 0.017(5) 0.000 0.000 0.006(4) 
B2 0.011(3) 0.018(4) 0.006(3) 0.002(3) 0.001(3) 0.011(3) 
Na1 0.027(2) 0.022(2) 0.026(2) 0.000 0.000 0.0157(18) 
Na2 0.018(3) 0.018(3) 0.024(5) 0.000 0.000 0.0091(14) 
Na3 0.019(3) 0.019(3) 0.021(5) 0.000 0.000 0.0095(14) 
O1 0.012(2) 0.012(2) 0.027(2) -0.0016(19) -0.0031(19) 0.0059(18) 
O1W 0.073(11) 0.073(11) 0.27(4) 0.000 0.000 0.037(5) 
O2 0.012(2) 0.015(2) 0.011(2) -0.0017(17) -0.0010(17) 0.0035(19) 
O3 0.009(2) 0.019(2) 0.013(2) 0.0010(18) 0.0005(17) 0.0053(18) 
O4 0.013(3) 0.007(3) 0.039(4) 0.000 0.000 -0.002(3) 
O5 0.009(2) 0.014(2) 0.014(2) 0.0020(17) 0.0036(18) 0.0035(19) 
O6 0.012(2) 0.010(2) 0.011(2) -0.0018(16) 0.0042(16) 0.0021(17) 
O7 0.008(3) 0.011(3) 0.007(3) 0.000 0.000 0.004(2) 
 
_geom_special_details 
; 
 All esds (except the esd in the dihedral angle between two l.s. planes) 
 are estimated using the full covariance matrix.  The cell esds are taken 
 into account individually in the estimation of esds in distances, angles 
 and torsion angles; correlations between esds in cell parameters are only 
 used when they are defined by crystal symmetry.  An approximate (isotropic) 
 treatment of cell esds is used for estimating esds involving l.s. planes. 
; 
 
loop_ 
 _geom_bond_atom_site_label_1 
 _geom_bond_atom_site_label_2 
 _geom_bond_distance 
 _geom_bond_site_symmetry_2 
 _geom_bond_publ_flag 
K1 O6 2.889(4) 8_566 ? 
K1 O6 2.889(4) 2_765 ? 
K1 O6 2.889(4) 7_776 ? 
K1 O6 2.889(4) . ? 
K1 O6 2.889(4) 9_656 ? 
K1 O6 2.889(4) 3_675 ? 
K1 O5 3.403(4) . ? 
K1 O5 3.403(4) 7_776 ? 
K1 O5 3.403(4) 9_656 ? 
K1 O5 3.403(4) 3_675 ? 
K1 O5 3.403(4) 8_566 ? 
K1 O5 3.403(4) 2_765 ? 
Cu1 O3 1.974(4) 7_666 ? 
Cu1 O3 1.974(4) . ? 
Cu1 O1 1.989(4) 7_666 ? 
Cu1 O1 1.989(4) . ? 
Cu1 O2 2.376(4) 7_666 ? 
Cu1 O2 2.376(4) . ? 
P1 O3 1.514(4) . ? 
P1 O1 1.520(4) 3_665 ? 
P1 O5 1.548(4) . ? 
P1 O6 1.562(4) . ? 
P1 Na2 3.008(3) 7_666 ? 
P1 Na1 3.131(3) . ? 
P1 Na3 3.371(5) 4_665 ? 
B1 O2 1.356(6) 10_556 ? 
B1 O2 1.356(6) . ? 
B1 O4 1.399(12) . ? 
B1 Na3 3.047(10) 10_556 ? 
B1 Na3 3.047(10) . ? 
B2 O7 1.430(7) . ? 
B2 O6 1.475(8) . ? 
B2 O2 1.476(8) 7_666 ? 
B2 O5 1.508(8) 8_566 ? 
Na1 O7 2.321(7) 8_566 ? 
Na1 O5 2.500(5) . ? 
Na1 O5 2.500(5) 10_556 ? 
Na1 O3 2.511(5) 10_556 ? 
Na1 O3 2.511(5) . ? 
Na1 O4 2.539(8) . ? 
Na2 O1W 1.857(9) . ? 
Na2 O1 2.323(7) 8_566 ? 
Na2 O1 2.323(7) 9_556 ? 
Na2 O1 2.323(7) 7_666 ? 
Na2 O3 2.780(4) 9_556 ? 
Na2 O3 2.780(4) 8_566 ? 
Na2 O3 2.780(4) 7_666 ? 
Na3 O1 2.372(7) 5_564 ? 
Na3 O1 2.372(7) 6_554 ? 
Na3 O1 2.372(7) 4_664 ? 
Na3 O4 2.670(8) 2_665 ? 
Na3 O4 2.670(8) 3_565 ? 
Na3 O4 2.670(8) . ? 
Na3 O2 2.945(5) 12_566 ? 
Na3 O2 2.945(5) 11_666 ? 
Na3 O2 2.945(5) 10_556 ? 
Na3 B1 3.047(10) 2_665 ? 
Na3 B1 3.047(10) 3_565 ? 
O1 P1 1.520(4) 2_655 ? 
O1 Na2 2.323(7) 7_666 ? 
O1 Na3 2.372(7) 4_665 ? 
O1W Na2 1.857(9) 10_557 ? 
O2 B2 1.476(8) 7_666 ? 
O2 Na3 2.945(5) 10_556 ? 
O3 Na2 2.780(4) 7_666 ? 
O4 Na3 2.670(8) 10_556 ? 
O5 B2 1.508(8) 9_656 ? 
O7 B2 1.430(7) 10_557 ? 
O7 Na1 2.321(7) 9_656 ? 
 
loop_ 
 _geom_angle_atom_site_label_1 
 _geom_angle_atom_site_label_2 
 _geom_angle_atom_site_label_3 
 _geom_angle 
 _geom_angle_site_symmetry_1 
 _geom_angle_site_symmetry_3 
 _geom_angle_publ_flag 
O6 K1 O6 180.0 8_566 2_765 ? 
O6 K1 O6 113.42(7) 8_566 7_776 ? 
O6 K1 O6 66.58(7) 2_765 7_776 ? 
O6 K1 O6 66.58(7) 8_566 . ? 
O6 K1 O6 113.42(7) 2_765 . ? 
O6 K1 O6 180.0 7_776 . ? 
O6 K1 O6 113.42(7) 8_566 9_656 ? 
O6 K1 O6 66.58(7) 2_765 9_656 ? 
O6 K1 O6 113.42(7) 7_776 9_656 ? 
O6 K1 O6 66.58(7) . 9_656 ? 
O6 K1 O6 66.58(7) 8_566 3_675 ? 
O6 K1 O6 113.42(7) 2_765 3_675 ? 
O6 K1 O6 66.58(7) 7_776 3_675 ? 
O6 K1 O6 113.42(7) . 3_675 ? 
O6 K1 O6 180.000(1) 9_656 3_675 ? 
O6 K1 O5 69.56(11) 8_566 . ? 
O6 K1 O5 110.44(11) 2_765 . ? 
O6 K1 O5 134.54(11) 7_776 . ? 
O6 K1 O5 45.46(11) . . ? 
O6 K1 O5 43.86(10) 9_656 . ? 
O6 K1 O5 136.14(10) 3_675 . ? 
O6 K1 O5 110.44(11) 8_566 7_776 ? 
O6 K1 O5 69.56(11) 2_765 7_776 ? 
O6 K1 O5 45.46(11) 7_776 7_776 ? 
O6 K1 O5 134.54(11) . 7_776 ? 
O6 K1 O5 136.14(10) 9_656 7_776 ? 
O6 K1 O5 43.86(10) 3_675 7_776 ? 
O5 K1 O5 180.000(1) . 7_776 ? 
O6 K1 O5 136.14(10) 8_566 9_656 ? 
O6 K1 O5 43.86(10) 2_765 9_656 ? 
O6 K1 O5 110.44(11) 7_776 9_656 ? 
O6 K1 O5 69.56(11) . 9_656 ? 
O6 K1 O5 45.46(11) 9_656 9_656 ? 
O6 K1 O5 134.54(11) 3_675 9_656 ? 
O5 K1 O5 80.31(9) . 9_656 ? 
O5 K1 O5 99.69(9) 7_776 9_656 ? 
O6 K1 O5 43.86(10) 8_566 3_675 ? 
O6 K1 O5 136.14(10) 2_765 3_675 ? 
O6 K1 O5 69.56(11) 7_776 3_675 ? 
O6 K1 O5 110.44(11) . 3_675 ? 
O6 K1 O5 134.54(11) 9_656 3_675 ? 
O6 K1 O5 45.46(11) 3_675 3_675 ? 
O5 K1 O5 99.69(9) . 3_675 ? 
O5 K1 O5 80.31(9) 7_776 3_675 ? 
O5 K1 O5 180.000(1) 9_656 3_675 ? 
O6 K1 O5 45.46(11) 8_566 8_566 ? 
O6 K1 O5 134.54(10) 2_765 8_566 ? 
O6 K1 O5 136.14(10) 7_776 8_566 ? 
O6 K1 O5 43.86(10) . 8_566 ? 
O6 K1 O5 110.44(11) 9_656 8_566 ? 
O6 K1 O5 69.56(11) 3_675 8_566 ? 
O5 K1 O5 80.31(9) . 8_566 ? 
O5 K1 O5 99.69(9) 7_776 8_566 ? 
O5 K1 O5 99.69(9) 9_656 8_566 ? 
O5 K1 O5 80.31(9) 3_675 8_566 ? 
O6 K1 O5 134.54(11) 8_566 2_765 ? 
O6 K1 O5 45.46(11) 2_765 2_765 ? 
O6 K1 O5 43.86(10) 7_776 2_765 ? 
O6 K1 O5 136.14(10) . 2_765 ? 
O6 K1 O5 69.56(11) 9_656 2_765 ? 
O6 K1 O5 110.44(11) 3_675 2_765 ? 
O5 K1 O5 99.69(9) . 2_765 ? 
O5 K1 O5 80.31(9) 7_776 2_765 ? 
O5 K1 O5 80.31(9) 9_656 2_765 ? 
O5 K1 O5 99.69(9) 3_675 2_765 ? 
O5 K1 O5 180.0 8_566 2_765 ? 
O3 Cu1 O3 180.00(17) 7_666 . ? 
O3 Cu1 O1 88.34(18) 7_666 7_666 ? 
O3 Cu1 O1 91.66(18) . 7_666 ? 
O3 Cu1 O1 91.66(18) 7_666 . ? 
O3 Cu1 O1 88.34(18) . . ? 
O1 Cu1 O1 180.000(1) 7_666 . ? 
O3 Cu1 O2 97.76(16) 7_666 7_666 ? 
O3 Cu1 O2 82.24(16) . 7_666 ? 
O1 Cu1 O2 88.49(16) 7_666 7_666 ? 
O1 Cu1 O2 91.51(16) . 7_666 ? 
O3 Cu1 O2 82.24(16) 7_666 . ? 
O3 Cu1 O2 97.76(16) . . ? 
O1 Cu1 O2 91.51(16) 7_666 . ? 
O1 Cu1 O2 88.49(16) . . ? 
O2 Cu1 O2 180.000(1) 7_666 . ? 
O3 Cu1 Na2 50.99(14) 7_666 . ? 
O3 Cu1 Na2 129.01(14) . . ? 
O1 Cu1 Na2 37.48(14) 7_666 . ? 
O1 Cu1 Na2 142.52(14) . . ? 
O2 Cu1 Na2 90.84(16) 7_666 . ? 
O2 Cu1 Na2 89.16(16) . . ? 
O3 Cu1 Na2 129.01(14) 7_666 7_666 ? 
O3 Cu1 Na2 50.99(13) . 7_666 ? 
O1 Cu1 Na2 142.52(14) 7_666 7_666 ? 
O1 Cu1 Na2 37.48(14) . 7_666 ? 
O2 Cu1 Na2 89.16(16) 7_666 7_666 ? 
O2 Cu1 Na2 90.84(16) . 7_666 ? 
Na2 Cu1 Na2 180.0 . 7_666 ? 
O3 Cu1 Na3 73.63(15) 7_666 10_556 ? 
O3 Cu1 Na3 106.37(15) . 10_556 ? 
O1 Cu1 Na3 38.51(14) 7_666 10_556 ? 
O1 Cu1 Na3 141.49(14) . 10_556 ? 
O2 Cu1 Na3 125.12(15) 7_666 10_556 ? 
O2 Cu1 Na3 54.88(15) . 10_556 ? 
Na2 Cu1 Na3 41.3(2) . 10_556 ? 
Na2 Cu1 Na3 138.7(2) 7_666 10_556 ? 
O3 Cu1 Na3 106.37(15) 7_666 4_665 ? 
O3 Cu1 Na3 73.63(15) . 4_665 ? 
O1 Cu1 Na3 141.49(14) 7_666 4_665 ? 
O1 Cu1 Na3 38.51(14) . 4_665 ? 
O2 Cu1 Na3 54.88(15) 7_666 4_665 ? 
O2 Cu1 Na3 125.12(15) . 4_665 ? 
Na2 Cu1 Na3 138.7(2) . 4_665 ? 
Na2 Cu1 Na3 41.3(2) 7_666 4_665 ? 
Na3 Cu1 Na3 180.0 10_556 4_665 ? 
O3 P1 O1 112.9(2) . 3_665 ? 
O3 P1 O5 103.9(2) . . ? 
O1 P1 O5 112.4(2) 3_665 . ? 
O3 P1 O6 112.3(2) . . ? 
O1 P1 O6 109.5(3) 3_665 . ? 
O5 P1 O6 105.5(2) . . ? 
O3 P1 Na2 66.66(18) . 7_666 ? 
O1 P1 Na2 49.3(2) 3_665 7_666 ? 
O5 P1 Na2 108.6(2) . 7_666 ? 
O6 P1 Na2 145.0(2) . 7_666 ? 
O3 P1 Na1 52.35(18) . . ? 
O1 P1 Na1 135.3(2) 3_665 . ? 
O5 P1 Na1 52.13(18) . . ? 
O6 P1 Na1 115.07(19) . . ? 
Na2 P1 Na1 92.31(17) 7_666 . ? 
O3 P1 Na3 84.76(18) . 4_665 ? 
O5 P1 Na3 147.8(2) . 4_665 ? 
O6 P1 Na3 99.3(2) . 4_665 ? 
Na2 P1 Na3 46.1(2) 7_666 4_665 ? 
Na1 P1 Na3 132.00(14) . 4_665 ? 
O3 P1 K1 110.97(17) . . ? 
O1 P1 K1 135.34(18) 3_665 . ? 
O5 P1 K1 63.23(16) . . ? 
Na2 P1 K1 171.16(18) 7_666 . ? 
Na1 P1 K1 80.00(8) . . ? 
Na3 P1 K1 142.77(14) 4_665 . ? 
O2 B1 O2 123.8(9) 10_556 . ? 
O2 B1 O4 118.1(4) 10_556 . ? 
O2 B1 O4 118.1(4) . . ? 
O2 B1 Na3 138.5(6) 10_556 10_556 ? 
O2 B1 Na3 72.7(4) . 10_556 ? 
O4 B1 Na3 61.2(4) . 10_556 ? 
O2 B1 Na3 72.7(4) 10_556 . ? 
O2 B1 Na3 138.5(6) . . ? 
O4 B1 Na3 61.2(4) . . ? 
Na3 B1 Na3 72.7(4) 10_556 . ? 
O7 B2 O6 109.3(5) . . ? 
O7 B2 O2 112.9(5) . 7_666 ? 
O6 B2 O2 109.4(5) . 7_666 ? 
O7 B2 O5 108.3(5) . 8_566 ? 
O6 B2 O5 107.0(5) . 8_566 ? 
O2 B2 O5 109.8(5) 7_666 8_566 ? 
O7 Na1 O5 111.2(2) 8_566 . ? 
O7 Na1 O5 111.2(2) 8_566 10_556 ? 
O5 Na1 O5 73.2(2) . 10_556 ? 
O7 Na1 O3 119.58(13) 8_566 10_556 ? 
O5 Na1 O3 118.1(2) . 10_556 ? 
O5 Na1 O3 57.53(14) 10_556 10_556 ? 
O7 Na1 O3 119.58(13) 8_566 . ? 
O5 Na1 O3 57.53(14) . . ? 
O5 Na1 O3 118.1(2) 10_556 . ? 
O3 Na1 O3 115.5(2) 10_556 . ? 
O7 Na1 O4 81.5(2) 8_566 . ? 
O5 Na1 O4 139.70(14) . . ? 
O5 Na1 O4 139.70(14) 10_556 . ? 
O3 Na1 O4 82.67(16) 10_556 . ? 
O3 Na1 O4 82.67(16) . . ? 
O7 Na1 P1 116.46(10) 8_566 . ? 
O5 Na1 P1 29.27(10) . . ? 
O5 Na1 P1 97.95(16) 10_556 . ? 
O3 Na1 P1 123.74(17) 10_556 . ? 
O3 Na1 P1 28.51(10) . . ? 
O4 Na1 P1 110.49(11) . . ? 
O7 Na1 P1 116.46(10) 8_566 10_556 ? 
O5 Na1 P1 97.95(16) . 10_556 ? 
O5 Na1 P1 29.27(10) 10_556 10_556 ? 
O3 Na1 P1 28.51(10) 10_556 10_556 ? 
O3 Na1 P1 123.74(17) . 10_556 ? 
O4 Na1 P1 110.49(11) . 10_556 ? 
P1 Na1 P1 115.97(13) . 10_556 ? 
O7 Na1 K1 63.59(11) 8_566 . ? 
O5 Na1 K1 48.67(11) . . ? 
O5 Na1 K1 99.20(15) 10_556 . ? 
O3 Na1 K1 156.62(16) 10_556 . ? 
O3 Na1 K1 75.75(11) . . ? 
O4 Na1 K1 120.07(12) . . ? 
P1 Na1 K1 56.62(5) . . ? 
P1 Na1 K1 128.10(12) 10_556 . ? 
O7 Na1 K1 63.59(11) 8_566 4_774 ? 
O5 Na1 K1 99.20(15) . 4_774 ? 
O5 Na1 K1 48.67(11) 10_556 4_774 ? 
O3 Na1 K1 75.75(11) 10_556 4_774 ? 
O3 Na1 K1 156.62(16) . 4_774 ? 
O4 Na1 K1 120.07(12) . 4_774 ? 
P1 Na1 K1 128.10(12) . 4_774 ? 
P1 Na1 K1 56.62(5) 10_556 4_774 ? 
K1 Na1 K1 86.99(8) . 4_774 ? 
O1W Na2 O1 121.5(2) . 8_566 ? 
O1W Na2 O1 121.5(2) . 9_556 ? 
O1 Na2 O1 95.2(3) 8_566 9_556 ? 
O1W Na2 O1 121.5(2) . 7_666 ? 
O1 Na2 O1 95.2(3) 8_566 7_666 ? 
O1 Na2 O1 95.2(3) 9_556 7_666 ? 
O1W Na2 Na3 180.000(3) . 10_556 ? 
O1 Na2 Na3 58.5(2) 8_566 10_556 ? 
O1 Na2 Na3 58.5(2) 9_556 10_556 ? 
O1 Na2 Na3 58.5(2) 7_666 10_556 ? 
O1W Na2 O3 95.5(2) . 9_556 ? 
O1 Na2 O3 58.59(15) 8_566 9_556 ? 
O1 Na2 O3 64.78(15) 9_556 9_556 ? 
O1 Na2 O3 142.8(4) 7_666 9_556 ? 
Na3 Na2 O3 84.5(2) 10_556 9_556 ? 
O1W Na2 O3 95.5(2) . 8_566 ? 
O1 Na2 O3 64.78(15) 8_566 8_566 ? 
O1 Na2 O3 142.8(4) 9_556 8_566 ? 
O1 Na2 O3 58.59(15) 7_666 8_566 ? 
Na3 Na2 O3 84.5(2) 10_556 8_566 ? 
O3 Na2 O3 119.09(7) 9_556 8_566 ? 
O1W Na2 O3 95.5(2) . 7_666 ? 
O1 Na2 O3 142.8(4) 8_566 7_666 ? 
O1 Na2 O3 58.59(15) 9_556 7_666 ? 
O1 Na2 O3 64.78(15) 7_666 7_666 ? 
Na3 Na2 O3 84.5(2) 10_556 7_666 ? 
O3 Na2 O3 119.09(7) 9_556 7_666 ? 
O3 Na2 O3 119.09(7) 8_566 7_666 ? 
O1W Na2 P1 105.39(18) . 9_556 ? 
O1 Na2 P1 29.74(11) 8_566 9_556 ? 
O1 Na2 P1 84.15(17) 9_556 9_556 ? 
O1 Na2 P1 123.7(3) 7_666 9_556 ? 
Na3 Na2 P1 74.61(18) 10_556 9_556 ? 
O3 Na2 P1 30.00(9) 9_556 9_556 ? 
O3 Na2 P1 89.64(11) 8_566 9_556 ? 
O3 Na2 P1 142.7(2) 7_666 9_556 ? 
O1W Na2 P1 105.39(18) . 7_666 ? 
O1 Na2 P1 123.7(3) 8_566 7_666 ? 
O1 Na2 P1 29.74(11) 9_556 7_666 ? 
O1 Na2 P1 84.15(17) 7_666 7_666 ? 
Na3 Na2 P1 74.61(18) 10_556 7_666 ? 
O3 Na2 P1 89.64(11) 9_556 7_666 ? 
O3 Na2 P1 142.7(2) 8_566 7_666 ? 
O3 Na2 P1 30.00(9) 7_666 7_666 ? 
P1 Na2 P1 113.22(15) 9_556 7_666 ? 
O1W Na2 P1 105.39(18) . 8_566 ? 
O1 Na2 P1 84.15(17) 8_566 8_566 ? 
O1 Na2 P1 123.7(3) 9_556 8_566 ? 
O1 Na2 P1 29.74(11) 7_666 8_566 ? 
Na3 Na2 P1 74.61(18) 10_556 8_566 ? 
O3 Na2 P1 142.7(2) 9_556 8_566 ? 
O3 Na2 P1 30.00(9) 8_566 8_566 ? 
O3 Na2 P1 89.64(11) 7_666 8_566 ? 
P1 Na2 P1 113.22(15) 9_556 8_566 ? 
P1 Na2 P1 113.22(15) 7_666 8_566 ? 
O1W Na2 Cu1 110.26(14) . 3_565 ? 
O1 Na2 Cu1 77.33(17) 8_566 3_565 ? 
O1 Na2 Cu1 31.39(11) 9_556 3_565 ? 
O1 Na2 Cu1 122.0(3) 7_666 3_565 ? 
Na3 Na2 Cu1 69.74(14) 10_556 3_565 ? 
O3 Na2 Cu1 33.48(9) 9_556 3_565 ? 
O3 Na2 Cu1 141.5(2) 8_566 3_565 ? 
O3 Na2 Cu1 87.21(11) 7_666 3_565 ? 
P1 Na2 Cu1 56.84(6) 9_556 3_565 ? 
P1 Na2 Cu1 57.22(6) 7_666 3_565 ? 
P1 Na2 Cu1 144.3(3) 8_566 3_565 ? 
O1 Na3 O1 92.7(3) 5_564 6_554 ? 
O1 Na3 O1 92.7(3) 5_564 4_664 ? 
O1 Na3 O1 92.7(3) 6_554 4_664 ? 
O1 Na3 Na2 56.6(2) 5_564 10_556 ? 
O1 Na3 Na2 56.6(2) 6_554 10_556 ? 
O1 Na3 Na2 56.6(2) 4_664 10_556 ? 
O1 Na3 O4 76.86(15) 5_564 2_665 ? 
O1 Na3 O4 142.39(19) 6_554 2_665 ? 
O1 Na3 O4 123.43(18) 4_664 2_665 ? 
Na2 Na3 O4 132.57(17) 10_556 2_665 ? 
O1 Na3 O4 123.43(17) 5_564 3_565 ? 
O1 Na3 O4 76.86(16) 6_554 3_565 ? 
O1 Na3 O4 142.39(19) 4_664 3_565 ? 
Na2 Na3 O4 132.57(17) 10_556 3_565 ? 
O4 Na3 O4 79.3(3) 2_665 3_565 ? 
O1 Na3 O4 142.39(19) 5_564 . ? 
O1 Na3 O4 123.43(17) 6_554 . ? 
O1 Na3 O4 76.86(15) 4_664 . ? 
Na2 Na3 O4 132.57(17) 10_556 . ? 
O4 Na3 O4 79.3(3) 2_665 . ? 
O4 Na3 O4 79.3(3) 3_565 . ? 
O1 Na3 O2 74.31(14) 5_564 12_566 ? 
O1 Na3 O2 71.43(13) 6_554 12_566 ? 
O1 Na3 O2 158.5(4) 4_664 12_566 ? 
Na2 Na3 O2 101.95(19) 10_556 12_566 ? 
O4 Na3 O2 70.96(19) 2_665 12_566 ? 
O4 Na3 O2 49.47(17) 3_565 12_566 ? 
O4 Na3 O2 123.8(3) . 12_566 ? 
O1 Na3 O2 71.43(13) 5_564 11_666 ? 
O1 Na3 O2 158.5(4) 6_554 11_666 ? 
O1 Na3 O2 74.31(14) 4_664 11_666 ? 
Na2 Na3 O2 101.95(19) 10_556 11_666 ? 
O4 Na3 O2 49.47(17) 2_665 11_666 ? 
O4 Na3 O2 123.8(3) 3_565 11_666 ? 
O4 Na3 O2 70.96(19) . 11_666 ? 
O2 Na3 O2 115.83(13) 12_566 11_666 ? 
O1 Na3 O2 158.5(4) 5_564 10_556 ? 
O1 Na3 O2 74.31(14) 6_554 10_556 ? 
O1 Na3 O2 71.43(13) 4_664 10_556 ? 
Na2 Na3 O2 101.95(19) 10_556 10_556 ? 
O4 Na3 O2 123.8(3) 2_665 10_556 ? 
O4 Na3 O2 70.96(19) 3_565 10_556 ? 
O4 Na3 O2 49.47(17) . 10_556 ? 
O2 Na3 O2 115.83(13) 12_566 10_556 ? 
O2 Na3 O2 115.83(13) 11_666 10_556 ? 
O1 Na3 B1 82.77(19) 5_564 2_665 ? 
O1 Na3 B1 169.6(2) 6_554 2_665 ? 
O1 Na3 B1 96.9(2) 4_664 2_665 ? 
Na2 Na3 B1 126.36(18) 10_556 2_665 ? 
O4 Na3 B1 27.3(2) 2_665 2_665 ? 
O4 Na3 B1 97.8(3) 3_565 2_665 ? 
O4 Na3 B1 63.3(3) . 2_665 ? 
O2 Na3 B1 98.3(3) 12_566 2_665 ? 
O2 Na3 B1 26.09(16) 11_666 2_665 ? 
O2 Na3 B1 112.7(3) 10_556 2_665 ? 
O1 Na3 B1 96.9(2) 5_564 3_565 ? 
O1 Na3 B1 82.77(19) 6_554 3_565 ? 
O1 Na3 B1 169.6(2) 4_664 3_565 ? 
Na2 Na3 B1 126.36(18) 10_556 3_565 ? 
O4 Na3 B1 63.3(3) 2_665 3_565 ? 
O4 Na3 B1 27.3(2) 3_565 3_565 ? 
O4 Na3 B1 97.8(3) . 3_565 ? 
O2 Na3 B1 26.09(16) 12_566 3_565 ? 
O2 Na3 B1 112.7(3) 11_666 3_565 ? 
O2 Na3 B1 98.3(3) 10_556 3_565 ? 
B1 Na3 B1 88.4(3) 2_665 3_565 ? 
P1 O1 Cu1 129.8(3) 2_655 . ? 
P1 O1 Na2 100.9(2) 2_655 7_666 ? 
Cu1 O1 Na2 111.1(2) . 7_666 ? 
P1 O1 Na3 118.4(2) 2_655 4_665 ? 
Cu1 O1 Na3 110.02(19) . 4_665 ? 
Na2 O1 Na3 64.8(3) 7_666 4_665 ? 
Na2 O1W Na2 180.000(7) 10_557 . ? 
B1 O2 B2 118.5(6) . 7_666 ? 
B1 O2 Cu1 122.0(5) . . ? 
B2 O2 Cu1 116.3(3) 7_666 . ? 
B1 O2 Na3 81.2(5) . 10_556 ? 
B2 O2 Na3 124.0(3) 7_666 10_556 ? 
Cu1 O2 Na3 83.83(19) . 10_556 ? 
P1 O3 Cu1 129.8(3) . . ? 
P1 O3 Na1 99.1(2) . . ? 
Cu1 O3 Na1 126.1(2) . . ? 
P1 O3 Na2 83.3(2) . 7_666 ? 
Cu1 O3 Na2 95.53(18) . 7_666 ? 
Na1 O3 Na2 113.5(3) . 7_666 ? 
B1 O4 Na1 115.9(6) . . ? 
B1 O4 Na3 91.5(4) . . ? 
Na1 O4 Na3 130.60(19) . . ? 
B1 O4 Na3 91.5(4) . 10_556 ? 
Na1 O4 Na3 130.60(19) . 10_556 ? 
Na3 O4 Na3 85.1(3) . 10_556 ? 
B2 O5 P1 131.5(4) 9_656 . ? 
B2 O5 Na1 129.4(3) 9_656 . ? 
P1 O5 Na1 98.6(2) . . ? 
B2 O5 K1 87.1(3) 9_656 . ? 
P1 O5 K1 92.80(18) . . ? 
Na1 O5 K1 97.86(15) . . ? 
B2 O6 P1 125.3(4) . . ? 
B2 O6 K1 109.4(3) . . ? 
P1 O6 K1 114.3(2) . . ? 
B2 O7 B2 117.7(7) . 10_557 ? 
B2 O7 Na1 115.0(3) . 9_656 ? 
B2 O7 Na1 115.0(3) 10_557 9_656 ? 
 
loop_ 
 _geom_torsion_atom_site_label_1 
 _geom_torsion_atom_site_label_2 
 _geom_torsion_atom_site_label_3 
 _geom_torsion_atom_site_label_4 
 _geom_torsion 
 _geom_torsion_site_symmetry_1 
 _geom_torsion_site_symmetry_2 
 _geom_torsion_site_symmetry_3 
 _geom_torsion_site_symmetry_4 
 _geom_torsion_publ_flag 
O6 K1 P1 O3 5.8(2) 8_566 . . . ? 
O6 K1 P1 O3 -174.2(2) 2_765 . . . ? 
O6 K1 P1 O3 -79.2(3) 7_776 . . . ? 
O6 K1 P1 O3 100.8(3) . . . . ? 
O6 K1 P1 O3 -146.6(2) 9_656 . . . ? 
O6 K1 P1 O3 33.4(2) 3_675 . . . ? 
O5 K1 P1 O3 -95.4(3) . . . . ? 
O5 K1 P1 O3 84.6(3) 7_776 . . . ? 
O5 K1 P1 O3 168.7(2) 9_656 . . . ? 
O5 K1 P1 O3 -11.3(2) 3_675 . . . ? 
O5 K1 P1 O3 58.3(2) 8_566 . . . ? 
O5 K1 P1 O3 -121.7(2) 2_765 . . . ? 
O6 K1 P1 O1 -163.2(3) 8_566 . . 3_665 ? 
O6 K1 P1 O1 16.8(3) 2_765 . . 3_665 ? 
O6 K1 P1 O1 111.7(3) 7_776 . . 3_665 ? 
O6 K1 P1 O1 -68.3(3) . . . 3_665 ? 
O6 K1 P1 O1 44.4(3) 9_656 . . 3_665 ? 
O6 K1 P1 O1 -135.6(3) 3_675 . . 3_665 ? 
O5 K1 P1 O1 95.5(3) . . . 3_665 ? 
O5 K1 P1 O1 -84.5(3) 7_776 . . 3_665 ? 
O5 K1 P1 O1 -0.4(3) 9_656 . . 3_665 ? 
O5 K1 P1 O1 179.6(3) 3_675 . . 3_665 ? 
O5 K1 P1 O1 -110.7(3) 8_566 . . 3_665 ? 
O5 K1 P1 O1 69.3(3) 2_765 . . 3_665 ? 
O6 K1 P1 O5 101.3(2) 8_566 . . . ? 
O6 K1 P1 O5 -78.7(2) 2_765 . . . ? 
O6 K1 P1 O5 16.2(3) 7_776 . . . ? 
O6 K1 P1 O5 -163.8(3) . . . . ? 
O6 K1 P1 O5 -51.2(2) 9_656 . . . ? 
O6 K1 P1 O5 128.8(2) 3_675 . . . ? 
O5 K1 P1 O5 180.0 7_776 . . . ? 
O5 K1 P1 O5 -95.9(2) 9_656 . . . ? 
O5 K1 P1 O5 84.1(2) 3_675 . . . ? 
O5 K1 P1 O5 153.8(2) 8_566 . . . ? 
O5 K1 P1 O5 -26.2(2) 2_765 . . . ? 
O6 K1 P1 O6 -94.9(3) 8_566 . . . ? 
O6 K1 P1 O6 85.1(3) 2_765 . . . ? 
O6 K1 P1 O6 180.000(2) 7_776 . . . ? 
O6 K1 P1 O6 112.6(2) 9_656 . . . ? 
O6 K1 P1 O6 -67.4(2) 3_675 . . . ? 
O5 K1 P1 O6 163.8(3) . . . . ? 
O5 K1 P1 O6 -16.2(3) 7_776 . . . ? 
O5 K1 P1 O6 67.9(2) 9_656 . . . ? 
O5 K1 P1 O6 -112.1(2) 3_675 . . . ? 
O5 K1 P1 O6 -42.4(2) 8_566 . . . ? 
O5 K1 P1 O6 137.6(2) 2_765 . . . ? 
O6 K1 P1 Na1 48.80(11) 8_566 . . . ? 
O6 K1 P1 Na1 -131.20(11) 2_765 . . . ? 
O6 K1 P1 Na1 -36.3(2) 7_776 . . . ? 
O6 K1 P1 Na1 143.7(2) . . . . ? 
O6 K1 P1 Na1 -103.64(12) 9_656 . . . ? 
O6 K1 P1 Na1 76.36(12) 3_675 . . . ? 
O5 K1 P1 Na1 -52.47(19) . . . . ? 
O5 K1 P1 Na1 127.53(19) 7_776 . . . ? 
O5 K1 P1 Na1 -148.39(10) 9_656 . . . ? 
O5 K1 P1 Na1 31.61(10) 3_675 . . . ? 
O5 K1 P1 Na1 101.28(11) 8_566 . . . ? 
O5 K1 P1 Na1 -78.72(11) 2_765 . . . ? 
O3 P1 Na1 O7 103.8(3) . . . 8_566 ? 
O1 P1 Na1 O7 -170.7(3) 3_665 . . 8_566 ? 
O5 P1 Na1 O7 -86.4(3) . . . 8_566 ? 
O6 P1 Na1 O7 4.2(3) . . . 8_566 ? 
Na2 P1 Na1 O7 161.7(2) 7_666 . . 8_566 ? 
Na3 P1 Na1 O7 135.6(2) 4_665 . . 8_566 ? 
K1 P1 Na1 O7 -22.7(2) . . . 8_566 ? 
O3 P1 Na1 O5 -169.7(3) . . . . ? 
O1 P1 Na1 O5 -84.3(3) 3_665 . . . ? 
O6 P1 Na1 O5 90.6(3) . . . . ? 
Na2 P1 Na1 O5 -111.9(2) 7_666 . . . ? 
Na3 P1 Na1 O5 -137.9(3) 4_665 . . . ? 
K1 P1 Na1 O5 63.8(2) . . . . ? 
O3 P1 Na1 O5 -137.7(3) . . . 10_556 ? 
O1 P1 Na1 O5 -52.2(3) 3_665 . . 10_556 ? 
O5 P1 Na1 O5 32.06(17) . . . 10_556 ? 
O6 P1 Na1 O5 122.7(2) . . . 10_556 ? 
Na2 P1 Na1 O5 -79.80(17) 7_666 . . 10_556 ? 
Na3 P1 Na1 O5 -105.87(19) 4_665 . . 10_556 ? 
K1 P1 Na1 O5 95.82(14) . . . 10_556 ? 
O3 P1 Na1 O3 -81.6(3) . . . 10_556 ? 
O1 P1 Na1 O3 3.8(4) 3_665 . . 10_556 ? 
O5 P1 Na1 O3 88.1(3) . . . 10_556 ? 
O6 P1 Na1 O3 178.7(2) . . . 10_556 ? 
Na2 P1 Na1 O3 -23.8(2) 7_666 . . 10_556 ? 
Na3 P1 Na1 O3 -49.8(3) 4_665 . . 10_556 ? 
K1 P1 Na1 O3 151.9(2) . . . 10_556 ? 
O1 P1 Na1 O3 85.4(3) 3_665 . . . ? 
O5 P1 Na1 O3 169.7(3) . . . . ? 
O6 P1 Na1 O3 -99.6(3) . . . . ? 
Na2 P1 Na1 O3 57.9(2) 7_666 . . . ? 
Na3 P1 Na1 O3 31.8(3) 4_665 . . . ? 
K1 P1 Na1 O3 -126.5(2) . . . . ? 
O3 P1 Na1 O4 13.3(3) . . . . ? 
O1 P1 Na1 O4 98.7(3) 3_665 . . . ? 
O5 P1 Na1 O4 -177.0(3) . . . . ? 
O6 P1 Na1 O4 -86.4(3) . . . . ? 
Na2 P1 Na1 O4 71.1(2) 7_666 . . . ? 
Na3 P1 Na1 O4 45.1(2) 4_665 . . . ? 
K1 P1 Na1 O4 -113.23(18) . . . . ? 
O3 P1 Na1 P1 -113.4(3) . . . 10_556 ? 
O1 P1 Na1 P1 -28.0(3) 3_665 . . 10_556 ? 
O5 P1 Na1 P1 56.3(2) . . . 10_556 ? 
O6 P1 Na1 P1 146.93(19) . . . 10_556 ? 
Na2 P1 Na1 P1 -55.55(16) 7_666 . . 10_556 ? 
Na3 P1 Na1 P1 -81.62(19) 4_665 . . 10_556 ? 
K1 P1 Na1 P1 120.07(14) . . . 10_556 ? 
O3 P1 Na1 K1 126.5(2) . . . . ? 
O1 P1 Na1 K1 -148.0(3) 3_665 . . . ? 
O5 P1 Na1 K1 -63.8(2) . . . . ? 
O6 P1 Na1 K1 26.87(18) . . . . ? 
Na2 P1 Na1 K1 -175.62(9) 7_666 . . . ? 
Na3 P1 Na1 K1 158.32(14) 4_665 . . . ? 
O3 P1 Na1 K1 179.9(3) . . . 4_774 ? 
O1 P1 Na1 K1 -94.7(3) 3_665 . . 4_774 ? 
O5 P1 Na1 K1 -10.4(2) . . . 4_774 ? 
O6 P1 Na1 K1 80.2(2) . . . 4_774 ? 
Na2 P1 Na1 K1 -122.25(13) 7_666 . . 4_774 ? 
Na3 P1 Na1 K1 -148.31(13) 4_665 . . 4_774 ? 
K1 P1 Na1 K1 53.37(10) . . . 4_774 ? 
O6 K1 Na1 O7 58.01(18) 8_566 . . 8_566 ? 
O6 K1 Na1 O7 -121.99(18) 2_765 . . 8_566 ? 
O6 K1 Na1 O7 -37.17(17) 7_776 . . 8_566 ? 
O6 K1 Na1 O7 142.83(17) . . . 8_566 ? 
O6 K1 Na1 O7 -145.74(17) 9_656 . . 8_566 ? 
O6 K1 Na1 O7 34.26(17) 3_675 . . 8_566 ? 
O5 K1 Na1 O7 -166.9(2) . . . 8_566 ? 
O5 K1 Na1 O7 13.1(2) 7_776 . . 8_566 ? 
O5 K1 Na1 O7 -168.78(15) 9_656 . . 8_566 ? 
O5 K1 Na1 O7 11.22(15) 3_675 . . 8_566 ? 
O5 K1 Na1 O7 97.26(16) 8_566 . . 8_566 ? 
O5 K1 Na1 O7 -82.74(16) 2_765 . . 8_566 ? 
O6 K1 Na1 O5 -135.05(19) 8_566 . . . ? 
O6 K1 Na1 O5 44.95(19) 2_765 . . . ? 
O6 K1 Na1 O5 129.77(16) 7_776 . . . ? 
O6 K1 Na1 O5 -50.23(16) . . . . ? 
O6 K1 Na1 O5 21.20(16) 9_656 . . . ? 
O6 K1 Na1 O5 -158.80(16) 3_675 . . . ? 
O5 K1 Na1 O5 180.000(1) 7_776 . . . ? 
O5 K1 Na1 O5 -1.84(18) 9_656 . . . ? 
O5 K1 Na1 O5 178.16(18) 3_675 . . . ? 
O5 K1 Na1 O5 -95.81(10) 8_566 . . . ? 
O5 K1 Na1 O5 84.19(10) 2_765 . . . ? 
O6 K1 Na1 O5 167.2(2) 8_566 . . 10_556 ? 
O6 K1 Na1 O5 -12.8(2) 2_765 . . 10_556 ? 
O6 K1 Na1 O5 72.00(17) 7_776 . . 10_556 ? 
O6 K1 Na1 O5 -108.00(17) . . . 10_556 ? 
O6 K1 Na1 O5 -36.56(15) 9_656 . . 10_556 ? 
O6 K1 Na1 O5 143.44(15) 3_675 . . 10_556 ? 
O5 K1 Na1 O5 -57.77(19) . . . 10_556 ? 
O5 K1 Na1 O5 122.23(19) 7_776 . . 10_556 ? 
O5 K1 Na1 O5 -59.61(16) 9_656 . . 10_556 ? 
O5 K1 Na1 O5 120.39(16) 3_675 . . 10_556 ? 
O5 K1 Na1 O5 -153.57(16) 8_566 . . 10_556 ? 
O5 K1 Na1 O5 26.43(16) 2_765 . . 10_556 ? 
O6 K1 Na1 O3 161.9(4) 8_566 . . 10_556 ? 
O6 K1 Na1 O3 -18.1(4) 2_765 . . 10_556 ? 
O6 K1 Na1 O3 66.7(4) 7_776 . . 10_556 ? 
O6 K1 Na1 O3 -113.3(4) . . . 10_556 ? 
O6 K1 Na1 O3 -41.8(4) 9_656 . . 10_556 ? 
O6 K1 Na1 O3 138.2(4) 3_675 . . 10_556 ? 
O5 K1 Na1 O3 -63.0(4) . . . 10_556 ? 
O5 K1 Na1 O3 117.0(4) 7_776 . . 10_556 ? 
O5 K1 Na1 O3 -64.9(4) 9_656 . . 10_556 ? 
O5 K1 Na1 O3 115.1(4) 3_675 . . 10_556 ? 
O5 K1 Na1 O3 -158.8(4) 8_566 . . 10_556 ? 
O5 K1 Na1 O3 21.2(4) 2_765 . . 10_556 ? 
O6 K1 Na1 O3 -76.00(17) 8_566 . . . ? 
O6 K1 Na1 O3 104.00(17) 2_765 . . . ? 
O6 K1 Na1 O3 -171.18(14) 7_776 . . . ? 
O6 K1 Na1 O3 8.82(14) . . . . ? 
O6 K1 Na1 O3 80.25(15) 9_656 . . . ? 
O6 K1 Na1 O3 -99.75(15) 3_675 . . . ? 
O5 K1 Na1 O3 59.05(17) . . . . ? 
O5 K1 Na1 O3 -120.95(17) 7_776 . . . ? 
O5 K1 Na1 O3 57.21(15) 9_656 . . . ? 
O5 K1 Na1 O3 -122.79(15) 3_675 . . . ? 
O5 K1 Na1 O3 -36.75(14) 8_566 . . . ? 
O5 K1 Na1 O3 143.25(14) 2_765 . . . ? 
O6 K1 Na1 O4 -3.42(19) 8_566 . . . ? 
O6 K1 Na1 O4 176.58(19) 2_765 . . . ? 
O6 K1 Na1 O4 -98.60(19) 7_776 . . . ? 
O6 K1 Na1 O4 81.40(19) . . . . ? 
O6 K1 Na1 O4 152.8(2) 9_656 . . . ? 
O6 K1 Na1 O4 -27.2(2) 3_675 . . . ? 
O5 K1 Na1 O4 131.6(2) . . . . ? 
O5 K1 Na1 O4 -48.4(2) 7_776 . . . ? 
O5 K1 Na1 O4 129.79(18) 9_656 . . . ? 
O5 K1 Na1 O4 -50.21(18) 3_675 . . . ? 
O5 K1 Na1 O4 35.83(18) 8_566 . . . ? 
O5 K1 Na1 O4 -144.17(18) 2_765 . . . ? 
O6 K1 Na1 P1 -99.32(14) 8_566 . . . ? 
O6 K1 Na1 P1 80.68(14) 2_765 . . . ? 
O6 K1 Na1 P1 165.50(10) 7_776 . . . ? 
O6 K1 Na1 P1 -14.50(10) . . . . ? 
O6 K1 Na1 P1 56.93(10) 9_656 . . . ? 
O6 K1 Na1 P1 -123.07(10) 3_675 . . . ? 
O5 K1 Na1 P1 35.73(13) . . . . ? 
O5 K1 Na1 P1 -144.27(13) 7_776 . . . ? 
O5 K1 Na1 P1 33.89(10) 9_656 . . . ? 
O5 K1 Na1 P1 -146.11(10) 3_675 . . . ? 
O5 K1 Na1 P1 -60.07(9) 8_566 . . . ? 
O5 K1 Na1 P1 119.93(9) 2_765 . . . ? 
O6 K1 Na1 P1 162.06(19) 8_566 . . 10_556 ? 
O6 K1 Na1 P1 -17.94(19) 2_765 . . 10_556 ? 
O6 K1 Na1 P1 66.88(16) 7_776 . . 10_556 ? 
O6 K1 Na1 P1 -113.12(16) . . . 10_556 ? 
O6 K1 Na1 P1 -41.69(14) 9_656 . . 10_556 ? 
O6 K1 Na1 P1 138.31(14) 3_675 . . 10_556 ? 
O5 K1 Na1 P1 -62.89(17) . . . 10_556 ? 
O5 K1 Na1 P1 117.11(17) 7_776 . . 10_556 ? 
O5 K1 Na1 P1 -64.73(14) 9_656 . . 10_556 ? 
O5 K1 Na1 P1 115.27(14) 3_675 . . 10_556 ? 
O5 K1 Na1 P1 -158.69(15) 8_566 . . 10_556 ? 
O5 K1 Na1 P1 21.31(15) 2_765 . . 10_556 ? 
O6 K1 Na1 K1 119.91(14) 8_566 . . 4_774 ? 
O6 K1 Na1 K1 -60.09(14) 2_765 . . 4_774 ? 
O6 K1 Na1 K1 24.73(11) 7_776 . . 4_774 ? 
O6 K1 Na1 K1 -155.27(11) . . . 4_774 ? 
O6 K1 Na1 K1 -83.84(10) 9_656 . . 4_774 ? 
O6 K1 Na1 K1 96.16(10) 3_675 . . 4_774 ? 
O5 K1 Na1 K1 -105.04(15) . . . 4_774 ? 
O5 K1 Na1 K1 74.96(15) 7_776 . . 4_774 ? 
O5 K1 Na1 K1 -106.88(9) 9_656 . . 4_774 ? 
O5 K1 Na1 K1 73.12(9) 3_675 . . 4_774 ? 
O5 K1 Na1 K1 159.15(9) 8_566 . . 4_774 ? 
O5 K1 Na1 K1 -20.85(9) 2_765 . . 4_774 ? 
O3 Cu1 O1 P1 49.6(4) 7_666 . . 2_655 ? 
O3 Cu1 O1 P1 -130.4(4) . . . 2_655 ? 
O2 Cu1 O1 P1 147.4(4) 7_666 . . 2_655 ? 
O2 Cu1 O1 P1 -32.6(4) . . . 2_655 ? 
Na2 Cu1 O1 P1 54.1(5) . . . 2_655 ? 
Na2 Cu1 O1 P1 -125.9(5) 7_666 . . 2_655 ? 
Na3 Cu1 O1 P1 -15.8(5) 10_556 . . 2_655 ? 
Na3 Cu1 O1 P1 164.2(5) 4_665 . . 2_655 ? 
O3 Cu1 O1 Na2 175.5(3) 7_666 . . 7_666 ? 
O3 Cu1 O1 Na2 -4.5(3) . . . 7_666 ? 
Na2 Cu1 O1 Na2 180.0 . . . 7_666 ? 
Na3 Cu1 O1 Na2 110.1(3) 10_556 . . 7_666 ? 
Na3 Cu1 O1 Na2 -69.9(3) 4_665 . . 7_666 ? 
O3 Cu1 O1 Na3 -114.6(3) 7_666 . . 4_665 ? 
O3 Cu1 O1 Na3 65.4(3) . . . 4_665 ? 
Na2 Cu1 O1 Na3 -110.1(3) . . . 4_665 ? 
Na2 Cu1 O1 Na3 69.9(3) 7_666 . . 4_665 ? 
Na3 Cu1 O1 Na3 180.0 10_556 . . 4_665 ? 
O2 B1 O2 B2 -13.5(12) 10_556 . . 7_666 ? 
O4 B1 O2 B2 166.4(7) . . . 7_666 ? 
Na3 B1 O2 B2 124.0(5) 10_556 . . 7_666 ? 
Na3 B1 O2 B2 89.2(9) . . . 7_666 ? 
O2 B1 O2 Cu1 145.6(6) 10_556 . . . ? 
O4 B1 O2 Cu1 -34.5(10) . . . . ? 
Na3 B1 O2 Cu1 -77.0(4) 10_556 . . . ? 
Na3 B1 O2 Cu1 -111.7(7) . . . . ? 
O2 B1 O2 Na3 -137.4(9) 10_556 . . 10_556 ? 
O4 B1 O2 Na3 42.4(7) . . . 10_556 ? 
Na3 B1 O2 Na3 -34.8(7) . . . 10_556 ? 
O3 Cu1 O2 B1 150.9(6) 7_666 . . . ? 
O3 Cu1 O2 B1 -29.1(6) . . . . ? 
O1 Cu1 O2 B1 62.8(6) 7_666 . . . ? 
O1 Cu1 O2 B1 -117.2(6) . . . . ? 
O1 P1 O3 Cu1 74.1(4) 3_665 . . . ? 
O5 P1 O3 Cu1 -163.8(3) . . . . ? 
O6 P1 O3 Cu1 -50.3(4) . . . . ? 
Na2 P1 O3 Cu1 91.7(4) 7_666 . . . ? 
Na1 P1 O3 Cu1 -155.5(4) . . . . ? 
Na3 P1 O3 Cu1 47.7(3) 4_665 . . . ? 
K1 P1 O3 Cu1 -97.5(3) . . . . ? 
O1 P1 O3 Na1 -130.4(2) 3_665 . . . ? 
O5 P1 O3 Na1 -8.3(3) . . . . ? 
O6 P1 O3 Na1 105.2(2) . . . . ? 
Na2 P1 O3 Na1 -112.8(3) 7_666 . . . ? 
Na3 P1 O3 Na1 -156.8(2) 4_665 . . . ? 
K1 P1 O3 Na1 57.95(19) . . . . ? 
O1 P1 O3 Na2 -17.5(3) 3_665 . . 7_666 ? 
O5 P1 O3 Na2 104.5(3) . . . 7_666 ? 
O6 P1 O3 Na2 -141.9(3) . . . 7_666 ? 
Na1 P1 O3 Na2 112.8(3) . . . 7_666 ? 
Na3 P1 O3 Na2 -44.0(2) 4_665 . . 7_666 ? 
K1 P1 O3 Na2 170.80(19) . . . 7_666 ? 
Na2 Cu1 O3 P1 94.1(4) . . . . ? 
Na2 Cu1 O3 P1 -85.9(4) 7_666 . . . ? 
Na3 Cu1 O3 P1 133.7(3) 10_556 . . . ? 
Na3 Cu1 O3 P1 -46.3(3) 4_665 . . . ? 
O1 Cu1 O3 Na2 -176.5(2) 7_666 . . 7_666 ? 
O1 Cu1 O3 Na2 3.5(2) . . . 7_666 ? 
O2 Cu1 O3 Na2 95.2(2) 7_666 . . 7_666 ? 
O2 Cu1 O3 Na2 -84.8(2) . . . 7_666 ? 
Na2 Cu1 O3 Na2 180.0 . . . 7_666 ? 
Na3 Cu1 O3 Na2 -140.3(2) 10_556 . . 7_666 ? 
Na3 Cu1 O3 Na2 39.7(2) 4_665 . . 7_666 ? 
O7 Na1 O3 P1 -91.6(3) 8_566 . . . ? 
O5 Na1 O3 P1 5.93(18) . . . . ? 
O5 Na1 O3 P1 49.1(3) 10_556 . . . ? 
O3 Na1 O3 P1 114.3(2) 10_556 . . . ? 
O4 Na1 O3 P1 -167.5(2) . . . . ? 
P1 Na1 O3 P1 82.8(3) 10_556 . . . ? 
K1 Na1 O3 P1 -43.82(17) . . . . ? 
K1 Na1 O3 P1 -0.2(5) 4_774 . . . ? 
O7 Na1 O3 Cu1 65.1(4) 8_566 . . . ? 
O5 Na1 O3 Cu1 162.7(3) . . . . ? 
O5 Na1 O3 Cu1 -154.1(2) 10_556 . . . ? 
O3 Na1 O3 Cu1 -88.9(3) 10_556 . . . ? 
O4 Na1 O3 Cu1 -10.7(3) . . . . ? 
P1 Na1 O3 Cu1 156.8(4) . . . . ? 
P1 Na1 O3 Cu1 -120.5(2) 10_556 . . . ? 
K1 Na1 O3 Cu1 112.9(2) . . . . ? 
K1 Na1 O3 Cu1 156.5(3) 4_774 . . . ? 
O7 Na1 O3 Na2 -178.3(2) 8_566 . . 7_666 ? 
O5 Na1 O3 Na2 -80.74(19) . . . 7_666 ? 
O5 Na1 O3 Na2 -37.6(3) 10_556 . . 7_666 ? 
O3 Na1 O3 Na2 27.6(3) 10_556 . . 7_666 ? 
O4 Na1 O3 Na2 105.9(2) . . . 7_666 ? 
P1 Na1 O3 Na2 -86.7(2) . . . 7_666 ? 
P1 Na1 O3 Na2 -3.9(3) 10_556 . . 7_666 ? 
K1 Na1 O3 Na2 -130.50(16) . . . 7_666 ? 
K1 Na1 O3 Na2 -86.9(4) 4_774 . . 7_666 ? 
O2 B1 O4 Na1 -90.1(7) 10_556 . . . ? 
O2 B1 O4 Na1 90.1(7) . . . . ? 
Na3 B1 O4 Na1 137.42(18) 10_556 . . . ? 
Na3 B1 O4 Na1 -137.42(18) . . . . ? 
O2 B1 O4 Na3 47.4(8) 10_556 . . . ? 
O2 B1 O4 Na3 -132.5(7) . . . . ? 
Na3 B1 O4 Na3 -85.2(4) 10_556 . . . ? 
O2 B1 O4 Na3 132.5(7) 10_556 . . 10_556 ? 
O2 B1 O4 Na3 -47.4(8) . . . 10_556 ? 
Na3 B1 O4 Na3 85.2(4) . . . 10_556 ? 
O7 Na1 O4 B1 180.0 8_566 . . . ? 
O5 Na1 O4 B1 -67.1(3) . . . . ? 
O5 Na1 O4 B1 67.1(3) 10_556 . . . ? 
O3 Na1 O4 B1 58.50(12) 10_556 . . . ? 
O3 Na1 O4 B1 -58.50(12) . . . . ? 
P1 Na1 O4 B1 -64.85(11) . . . . ? 
P1 Na1 O4 B1 64.85(11) 10_556 . . . ? 
K1 Na1 O4 B1 -127.31(11) . . . . ? 
K1 Na1 O4 B1 127.31(11) 4_774 . . . ? 
O7 Na1 O4 Na3 63.0(3) 8_566 . . . ? 
O5 Na1 O4 Na3 175.9(3) . . . . ? 
O5 Na1 O4 Na3 -49.9(6) 10_556 . . . ? 
O3 Na1 O4 Na3 -58.5(3) 10_556 . . . ? 
O3 Na1 O4 Na3 -175.5(3) . . . . ? 
P1 Na1 O4 Na3 178.1(3) . . . . ? 
P1 Na1 O4 Na3 -52.2(4) 10_556 . . . ? 
K1 Na1 O4 Na3 115.7(2) . . . . ? 
K1 Na1 O4 Na3 10.3(4) 4_774 . . . ? 
O7 Na1 O4 Na3 -63.0(3) 8_566 . . 10_556 ? 
O5 Na1 O4 Na3 49.9(6) . . . 10_556 ? 
O5 Na1 O4 Na3 -175.9(3) 10_556 . . 10_556 ? 
O3 Na1 O4 Na3 175.5(3) 10_556 . . 10_556 ? 
O3 Na1 O4 Na3 58.5(3) . . . 10_556 ? 
P1 Na1 O4 Na3 52.2(4) . . . 10_556 ? 
P1 Na1 O4 Na3 -178.1(3) 10_556 . . 10_556 ? 
K1 Na1 O4 Na3 -10.3(4) . . . 10_556 ? 
K1 Na1 O4 Na3 -115.7(2) 4_774 . . 10_556 ? 
O1 Na3 O4 B1 -176.8(6) 5_564 . . . ? 
O1 Na3 O4 B1 -15.4(5) 6_554 . . . ? 
O1 Na3 O4 B1 -99.8(4) 4_664 . . . ? 
Na2 Na3 O4 B1 -88.6(4) 10_556 . . . ? 
O4 Na3 O4 B1 131.9(3) 2_665 . . . ? 
O4 Na3 O4 B1 50.9(4) 3_565 . . . ? 
O2 Na3 O4 B1 73.6(4) 12_566 . . . ? 
O2 Na3 O4 B1 -177.5(4) 11_666 . . . ? 
O2 Na3 O4 B1 -23.1(3) 10_556 . . . ? 
B1 Na3 O4 B1 155.4(4) 2_665 . . . ? 
B1 Na3 O4 B1 71.1(3) 3_565 . . . ? 
O1 Na3 O4 Na1 -50.1(7) 5_564 . . . ? 
O1 Na3 O4 Na1 111.3(4) 6_554 . . . ? 
O1 Na3 O4 Na1 26.9(3) 4_664 . . . ? 
Na2 Na3 O4 Na1 38.1(4) 10_556 . . . ? 
O4 Na3 O4 Na1 -101.4(4) 2_665 . . . ? 
O4 Na3 O4 Na1 177.6(4) 3_565 . . . ? 
O2 Na3 O4 Na1 -159.7(2) 12_566 . . . ? 
O2 Na3 O4 Na1 -50.8(3) 11_666 . . . ? 
O2 Na3 O4 Na1 103.5(3) 10_556 . . . ? 
B1 Na3 O4 Na1 -77.9(4) 2_665 . . . ? 
B1 Na3 O4 Na1 -162.2(3) 3_565 . . . ? 
O1 Na3 O4 Na3 91.8(5) 5_564 . . 10_556 ? 
O1 Na3 O4 Na3 -106.8(3) 6_554 . . 10_556 ? 
O1 Na3 O4 Na3 168.80(18) 4_664 . . 10_556 ? 
Na2 Na3 O4 Na3 180.000(1) 10_556 . . 10_556 ? 
O4 Na3 O4 Na3 40.48(9) 2_665 . . 10_556 ? 
O4 Na3 O4 Na3 -40.48(9) 3_565 . . 10_556 ? 
O2 Na3 O4 Na3 -17.8(2) 12_566 . . 10_556 ? 
O2 Na3 O4 Na3 91.11(18) 11_666 . . 10_556 ? 
O2 Na3 O4 Na3 -114.5(2) 10_556 . . 10_556 ? 
B1 Na3 O4 Na3 64.0(2) 2_665 . . 10_556 ? 
B1 Na3 O4 Na3 -20.3(2) 3_565 . . 10_556 ? 
O3 P1 O5 B2 -164.6(5) . . . 9_656 ? 
O1 P1 O5 B2 -42.2(6) 3_665 . . 9_656 ? 
O6 P1 O5 B2 77.1(5) . . . 9_656 ? 
Na2 P1 O5 B2 -94.9(5) 7_666 . . 9_656 ? 
Na1 P1 O5 B2 -173.0(6) . . . 9_656 ? 
Na3 P1 O5 B2 -62.1(7) 4_665 . . 9_656 ? 
K1 P1 O5 B2 88.7(5) . . . 9_656 ? 
O3 P1 O5 Na1 8.4(3) . . . . ? 
O1 P1 O5 Na1 130.8(2) 3_665 . . . ? 
O6 P1 O5 Na1 -109.9(2) . . . . ? 
Na2 P1 O5 Na1 78.03(19) 7_666 . . . ? 
Na3 P1 O5 Na1 110.9(3) 4_665 . . . ? 
K1 P1 O5 Na1 -98.38(17) . . . . ? 
O3 P1 O5 K1 106.7(2) . . . . ? 
O1 P1 O5 K1 -130.8(2) 3_665 . . . ? 
O6 P1 O5 K1 -11.5(2) . . . . ? 
Na2 P1 O5 K1 176.41(9) 7_666 . . . ? 
Na1 P1 O5 K1 98.38(17) . . . . ? 
Na3 P1 O5 K1 -150.8(3) 4_665 . . . ? 
O7 Na1 O5 B2 -80.2(5) 8_566 . . 9_656 ? 
O5 Na1 O5 B2 26.5(5) 10_556 . . 9_656 ? 
O3 Na1 O5 B2 63.6(5) 10_556 . . 9_656 ? 
O3 Na1 O5 B2 167.4(5) . . . 9_656 ? 
O4 Na1 O5 B2 177.5(5) . . . 9_656 ? 
P1 Na1 O5 B2 173.2(6) . . . 9_656 ? 
P1 Na1 O5 B2 42.2(5) 10_556 . . 9_656 ? 
K1 Na1 O5 B2 -92.8(5) . . . 9_656 ? 
K1 Na1 O5 B2 -15.1(5) 4_774 . . 9_656 ? 
O7 Na1 O5 P1 106.6(2) 8_566 . . . ? 
O5 Na1 O5 P1 -146.69(14) 10_556 . . . ? 
O3 Na1 O5 P1 -109.6(2) 10_556 . . . ? 
O3 Na1 O5 P1 -5.79(18) . . . . ? 
O4 Na1 O5 P1 4.4(4) . . . . ? 
P1 Na1 O5 P1 -131.0(2) 10_556 . . . ? 
K1 Na1 O5 P1 94.1(2) . . . . ? 
K1 Na1 O5 P1 171.74(17) 4_774 . . . ? 
O7 Na1 O5 K1 12.54(18) 8_566 . . . ? 
O5 Na1 O5 K1 119.26(10) 10_556 . . . ? 
O3 Na1 O5 K1 156.36(17) 10_556 . . . ? 
O3 Na1 O5 K1 -99.85(16) . . . . ? 
O4 Na1 O5 K1 -89.7(3) . . . . ? 
P1 Na1 O5 K1 -94.1(2) . . . . ? 
P1 Na1 O5 K1 134.99(11) 10_556 . . . ? 
K1 Na1 O5 K1 77.68(10) 4_774 . . . ? 
O6 K1 O5 B2 160.1(3) 8_566 . . 9_656 ? 
O6 K1 O5 B2 -19.9(3) 2_765 . . 9_656 ? 
O6 K1 O5 B2 56.9(3) 7_776 . . 9_656 ? 
O6 K1 O5 B2 -123.1(3) . . . 9_656 ? 
O6 K1 O5 B2 -20.4(3) 9_656 . . 9_656 ? 
O6 K1 O5 B2 159.6(3) 3_675 . . 9_656 ? 
O6 K1 O5 P1 -68.38(18) 8_566 . . . ? 
O6 K1 O5 P1 111.62(18) 2_765 . . . ? 
O6 K1 O5 P1 -171.58(16) 7_776 . . . ? 
O6 K1 O5 P1 8.42(16) . . . . ? 
O6 K1 O5 P1 111.1(2) 9_656 . . . ? 
O6 K1 O5 P1 -68.9(2) 3_675 . . . ? 
O6 K1 O5 Na1 30.71(14) 8_566 . . . ? 
O6 K1 O5 Na1 -149.29(14) 2_765 . . . ? 
O6 K1 O5 Na1 -72.50(19) 7_776 . . . ? 
O6 K1 O5 Na1 107.50(19) . . . . ? 
O6 K1 O5 Na1 -149.8(2) 9_656 . . . ? 
O6 K1 O5 Na1 30.2(2) 3_675 . . . ? 
O7 B2 O6 P1 139.6(5) . . . . ? 
O2 B2 O6 P1 15.6(7) 7_666 . . . ? 
O5 B2 O6 P1 -103.4(5) 8_566 . . . ? 
O7 B2 O6 K1 -78.9(5) . . . . ? 
O2 B2 O6 K1 157.0(3) 7_666 . . . ? 
O5 B2 O6 K1 38.1(5) 8_566 . . . ? 
O3 P1 O6 B2 42.3(5) . . . . ? 
O1 P1 O6 B2 -84.0(5) 3_665 . . . ? 
O5 P1 O6 B2 154.9(4) . . . . ? 
Na2 P1 O6 B2 -38.4(6) 7_666 . . . ? 
Na1 P1 O6 B2 99.8(5) . . . . ? 
Na3 P1 O6 B2 -45.8(5) 4_665 . . . ? 
K1 P1 O6 B2 139.9(6) . . . . ? 
O3 P1 O6 K1 -97.6(2) . . . . ? 
O1 P1 O6 K1 136.2(2) 3_665 . . . ? 
O5 P1 O6 K1 15.0(3) . . . . ? 
Na2 P1 O6 K1 -178.26(14) 7_666 . . . ? 
Na1 P1 O6 K1 -40.0(2) . . . . ? 
Na3 P1 O6 K1 174.32(13) 4_665 . . . ? 
O6 B2 O7 B2 -164.5(4) . . . 10_557 ? 
O2 B2 O7 B2 -42.6(9) 7_666 . . 10_557 ? 
O5 B2 O7 B2 79.2(8) 8_566 . . 10_557 ? 
O6 B2 O7 Na1 -23.9(6) . . . 9_656 ? 
O2 B2 O7 Na1 98.0(5) 7_666 . . 9_656 ? 
O5 B2 O7 Na1 -140.2(4) 8_566 . . 9_656 ? 
 
_diffrn_measured_fraction_theta_max    0.995 
_diffrn_reflns_theta_full              26.44 
_diffrn_measured_fraction_theta_full   0.995 
_refine_diff_density_max    1.782 
_refine_diff_density_min   -1.163 
_refine_diff_density_rms    0.179 
